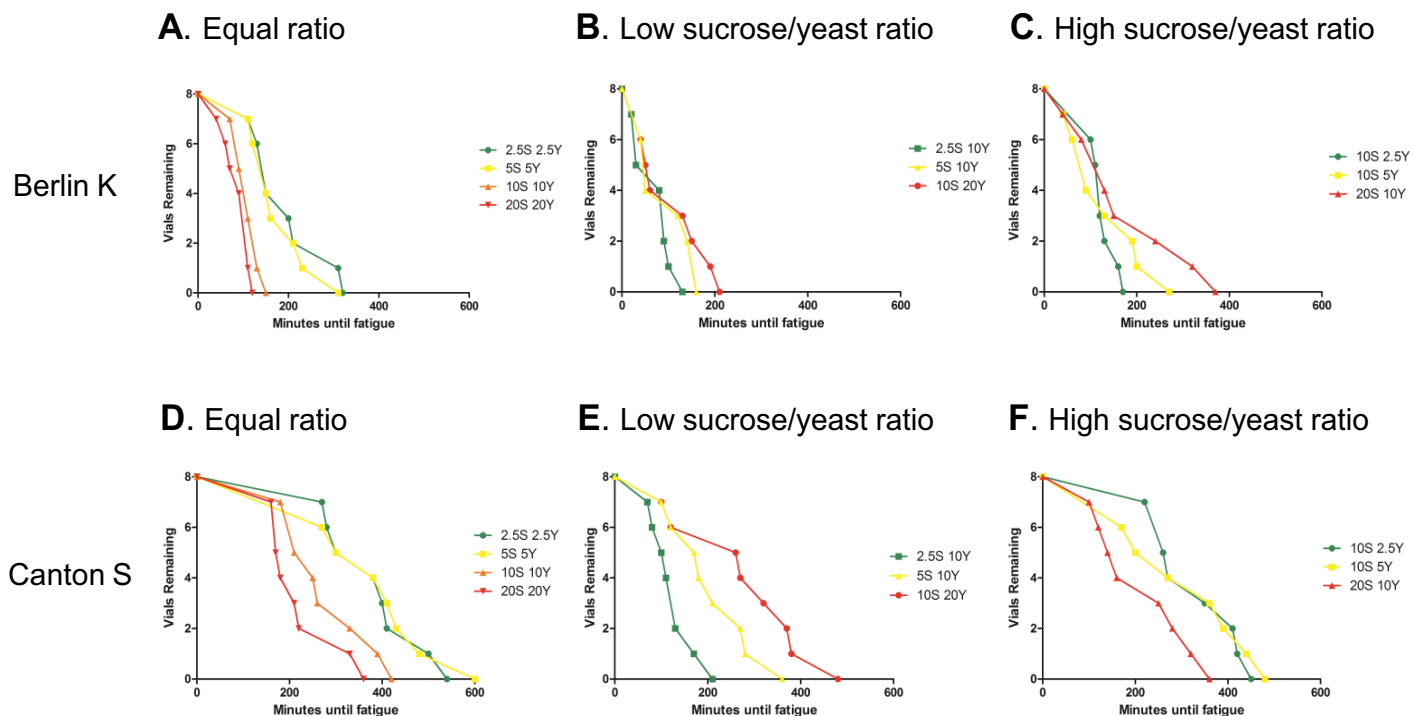

**Fig. S1.** 'Runspan' curves for endurance experiment in Fig. 1. All panels from Fig. 1 are alternatively shown as survival curves.

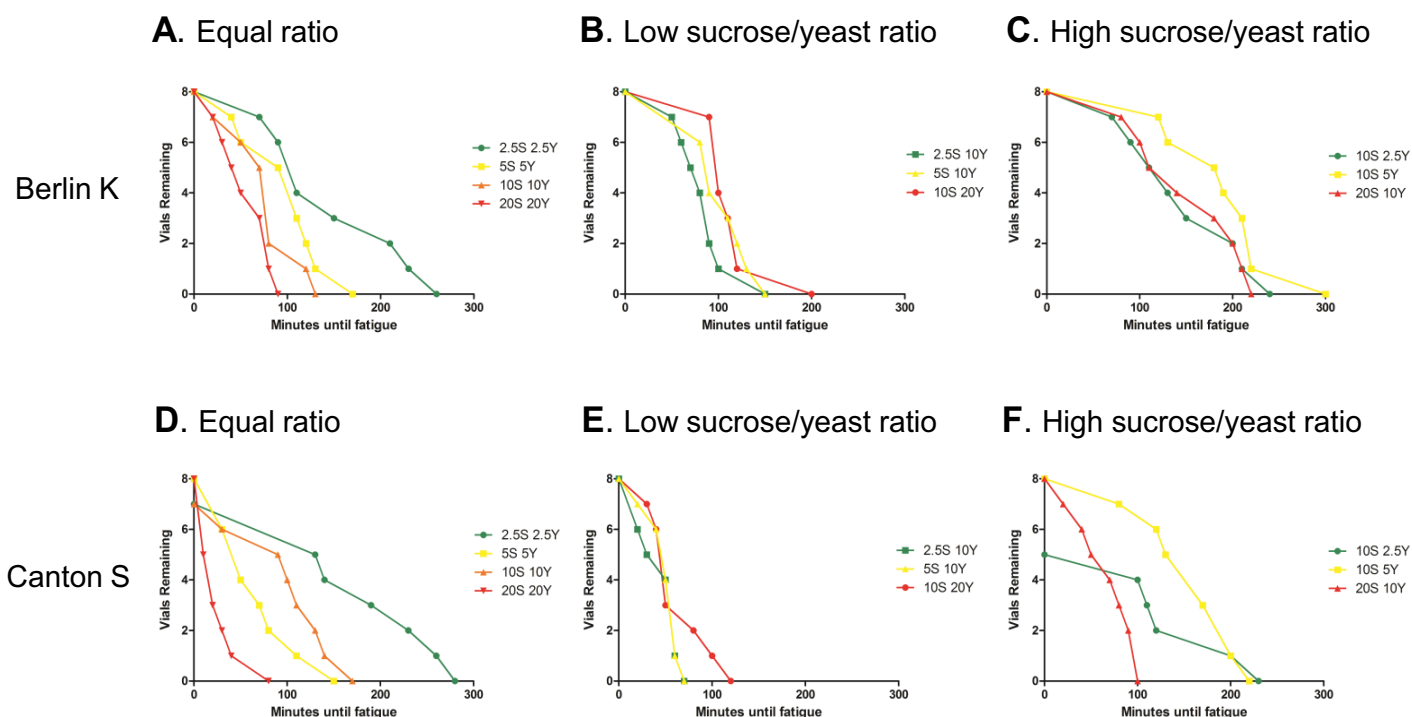

**Fig. S2.** 'Runspan' curves for endurance experiment in Fig. 2. All panels from Fig. 2 are alternatively presented as survival curves.

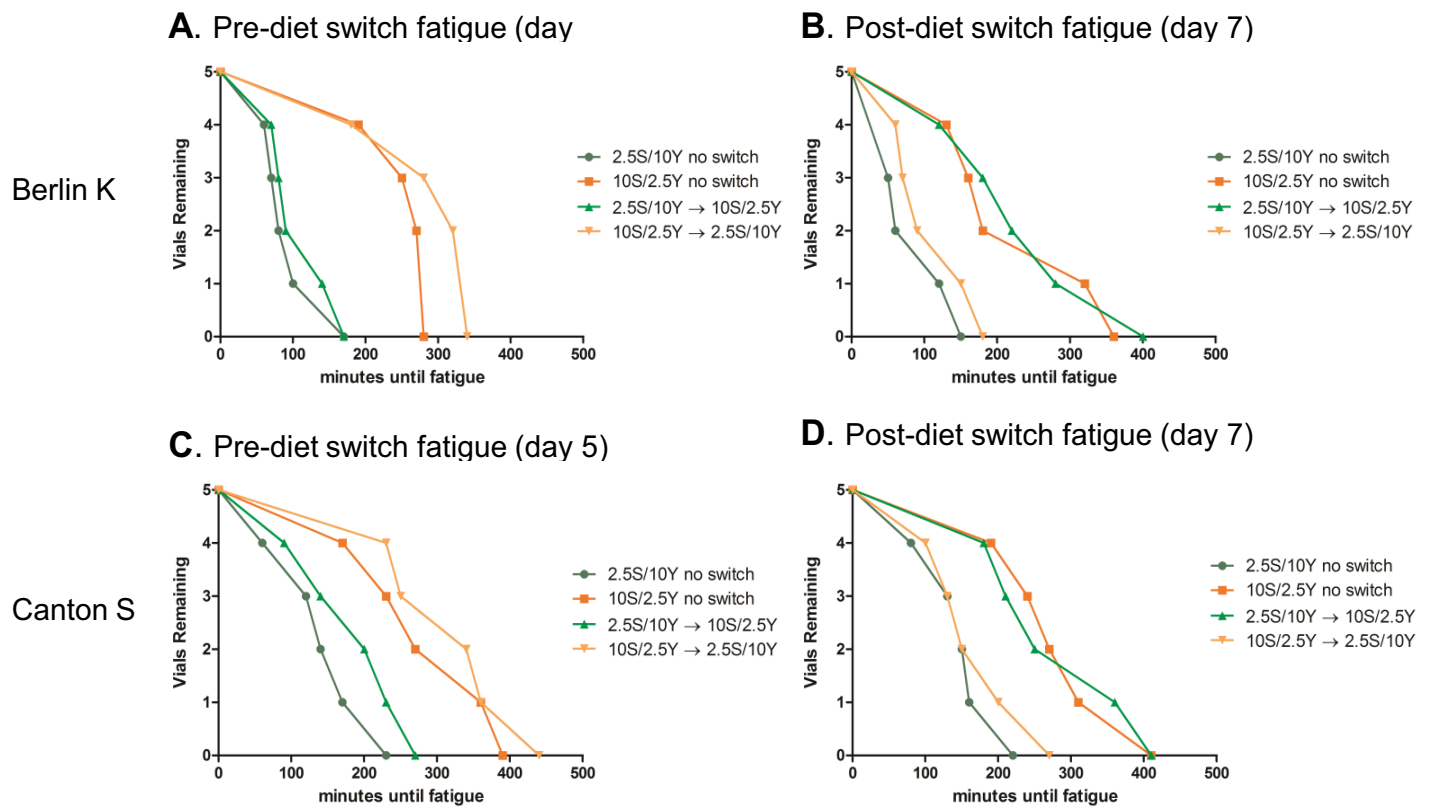

**Fig. S3.** ‘Runspan’ curves for endurance experiment in Fig. 6. All panels from Fig. 6 are alternatively graphed as survival curves.

[Click here to download Table S1](#)

[Click here to download Table S2](#)
